# Supplementary material
Source: MDPI journal article supplement (https://www.mdpi.com/2079-6447/2/2/14)
Supplement: s1 [file s1]

# Supporting Information

## Effective removal of methyl orange dyes using an adsorbent prepared from porous starch aerogel and organoclay

Rihem Jemai<sup>1</sup>, Mohamed Amine Djebbi<sup>1,\*</sup>, Saber Boubakri<sup>1</sup>, Hafsia Ben Rhaïem<sup>1</sup>, Abdesslem Ben Haj Amara<sup>1</sup>

<sup>1</sup>Laboratory of Ressources, Materials & Ecosystem (RME), University of Carthage, Faculty of Sciences of Bizerte, Zarzouna, 7021, Tunisia

\*Corresponding Author: Mohamed Amine Djebbi

E-mail: med-djebbi@hotmail.fr

mohammed-amine.djebbi@inrae.fr

Phone number: (00) 216 27 380 672

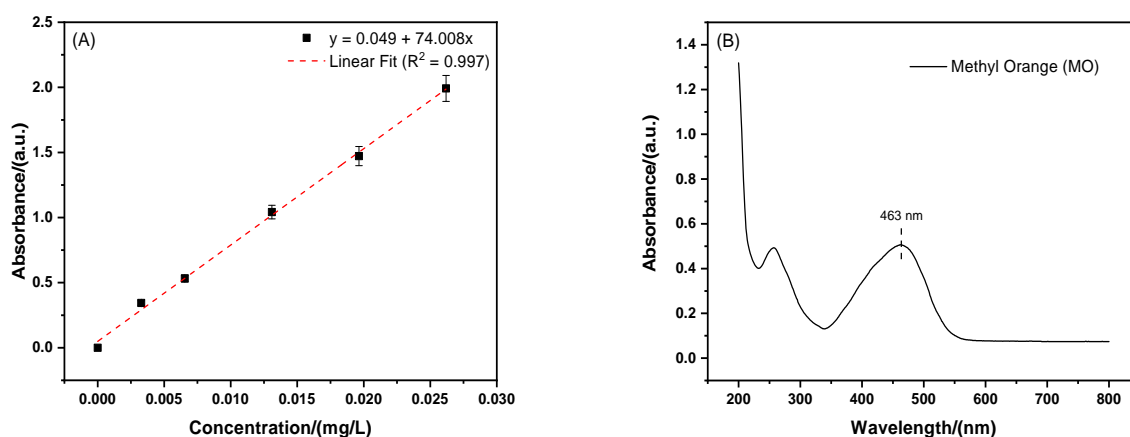

**Figure S1.** Calibration plot (A) and UV-vis spectrum (B) of MO.
